# Supplementary material
Source: MDPI journal article supplement (https://www.mdpi.com/2072-4292/8/8/639)
Supplement: s1 [file s1]

# Supplementary Materials: Alpine Forest Drought Monitoring in South Tyrol: PCA Based Synergy between scPDSI Data and MODIS Derived NDVI and NDII7 Time Series

Katarzyna Ewa Lewińska, Eva Ivits, Mathias Schardt and Marc Zebisch

**Table S1.** Complete list of meteorological stations used in the study with station number (corresponds with Figure 1), name of the location (in Italian), elevation and length of records used in the survey.

| Station Number | Name (Italian)        | Elevation (m asl) | Records Since (January) |
|----------------|-----------------------|-------------------|-------------------------|
| 250            | Monte Maria           | 1310              | 1967                    |
| 970            | Silandro              | 698               | 1988                    |
| 1120           | Diga di Gioveretto    | 1851              | 1973                    |
| 1580           | Vernago-Finale        | 1950              | 1967                    |
| 1930           | Naturno               | 541               | 1973                    |
| 2090           | Plata                 | 1147              | 1936                    |
| 2320           | Merano-Quarazze       | 330               | 1983                    |
| 2580           | Diga di Zoccolo       | 1144              | 1979                    |
| 3260           | Vipiteno              | 948               | 1935                    |
| 3360           | Diga di Vizze         | 1365              | 1973                    |
| 3450           | Ridanna               | 1350              | 1969                    |
| 3910           | Bressanone            | 560               | 1971                    |
| 4080           | Dobbiaco              | 1220              | 1967                    |
| 4450           | S.Maddalena in Casies | 1398              | 1967                    |
| 4760           | Anterselva di Mezzo   | 1236              | 1941                    |
| 5050           | Predoi                | 1449              | 1980                    |
| 5980           | Brunico               | 821               | 1986                    |
| 6150           | La Villa in Badia     | 1390              | 1987                    |
| 6560           | Terento               | 1349              | 1981                    |
| 6650           | Fundres               | 1159              | 1977                    |
| 7490           | Ponte Gardena         | 490               | 1984                    |
| 7560           | Fie allo Sciliar      | 840               | 1956                    |
| 8220           | Sarentino             | 966               | 1977                    |
| 8320           | Bolzano               | 254               | 1949                    |
| 8680           | Ora                   | 250               | 1983                    |
| 9150           | Sesto                 | 1310              | 1956                    |

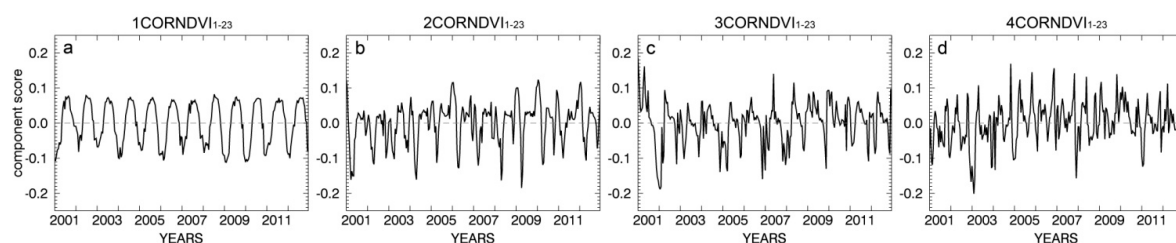

**Figure S1.** First four PCs resulted from the S-mode correlation-matrix based PCA of the NDVI<sub>1-23</sub> (full year NDVI) time series, herein: (a) 1CORNDVI<sub>1-23</sub>; (b) 2CORNDVI<sub>1-23</sub>; (c) 3CORNDVI<sub>1-23</sub> and (d) 4CORNDVI<sub>1-23</sub>. Temporal patterns explained 63.23%, 3.29%, 2.68% and 1.69% of the total NDVI<sub>1-23</sub> time series variance respectively.

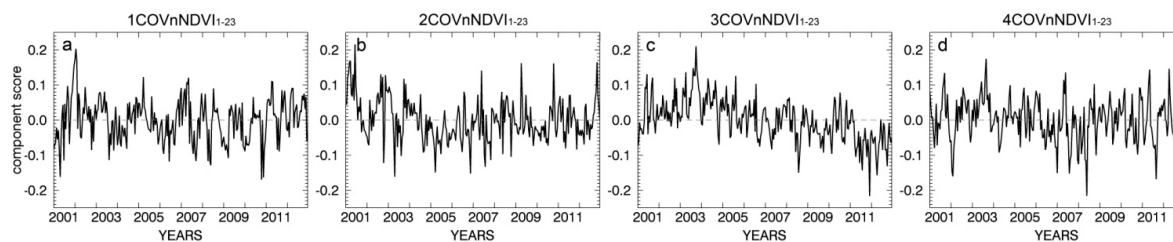

**Figure S2.** First four PCs resulted from the S-mode covariance-matrix based PCA of the nNDVI<sub>1-23</sub> (full year z-score normalized NDVI) time series, herein: (a) 1COVnNDVI<sub>1-23</sub>; (b) 2COVnNDVI<sub>1-23</sub>; (c) 3COVnNDVI<sub>1-23</sub> and (d) 4COVnNDVI<sub>1-23</sub>. Temporal patterns explained 18.55%, 5.35%, 2.31% and 1.79% of the total nNDVI<sub>1-23</sub> time series variance respectively.

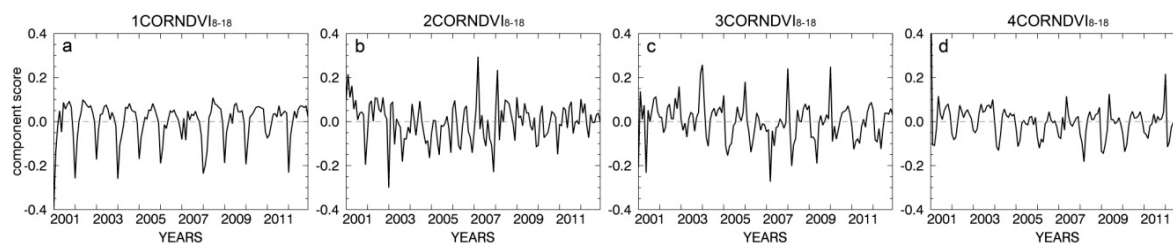

**Figure S3.** First four PCs resulted from the S-mode correlation-matrix based PCA of the NDVI<sub>8-18</sub> (vegetation season NDVI) time series, herein: (a) 1CORNDVI<sub>8-18</sub>; (b) 2CORNDVI<sub>8-18</sub>; (c) 3CORNDVI<sub>8-18</sub> and (d) 4CORNDVI<sub>8-18</sub>. Temporal patterns explained 41.94%, 4.77%, 3.04% and 2.68% of the total NDVI<sub>8-18</sub> time series variance respectively.

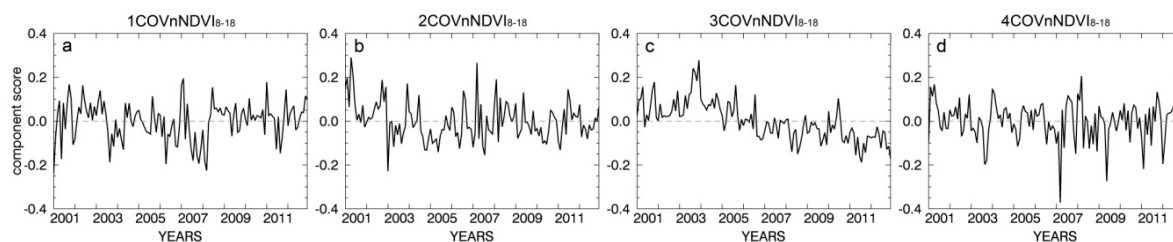

**Figure S4.** First four PCs resulted from the S-mode covariance-matrix based PCA of the nNDVI<sub>8-18</sub> (z-score normalized vegetation season NDVI) time series, herein: (a) 1COVnNDVI<sub>8-18</sub>; (b) 2COVnNDVI<sub>8-18</sub>; (c) 3COVnNDVI<sub>8-18</sub> and (d) 4COVnNDVI<sub>8-18</sub>. Temporal patterns explained 15.25%, 5.65%, 3.37% and 2.28% of the total nNDVI<sub>8-18</sub> time series variance respectively.

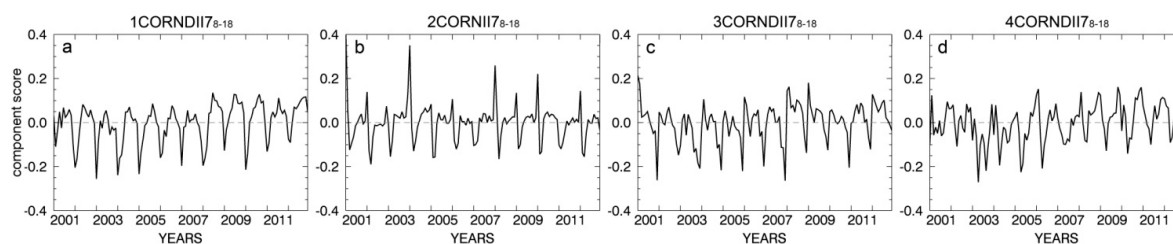

**Figure S5.** First four PCs resulted from the S-mode correlation-matrix based PCA of the NDII<sub>7-18</sub> (vegetation season NDII7) time series, herein: (a) 1CORNDII<sub>7-18</sub>; (b) 2CORNDII<sub>7-18</sub>; (c) 3CORNDII<sub>7-18</sub> and (d) 4CORNDII<sub>7-18</sub>. Temporal patterns explained 22.55%, 8.66%, 4.40% and 2.68% of the total NDII<sub>7-18</sub> time series variance respectively.

**Table S2.** Correlation between the scPDSI scores and first four PCs obtained through the S-mode (a) correlation-matrix based PCA of the NDVI<sub>1–23</sub> (full year NDVI) time series; (b) covariance-matrix based PCA of the nNDVI<sub>1–23</sub> (full year normalized NDVI) time series; (c) correlation-matrix based PCA of the NDVI<sub>8–18</sub> (vegetation season NDVI) time series; (d) covariance-matrix based PCA of the nNDVI<sub>8–18</sub> (vegetation season normalized NDVI) time series; (e) correlation-matrix based PCA of the NDII<sub>7–18</sub> (vegetation season NDII7) time series; (f) covariance-matrix based PCA of the nNDII<sub>7–18</sub> (vegetation season normalized NDII7) time series. Due to inconsistent length of scPDSI, as well as NDVI and NDII7 based datasets all time evolution patterns were converted into yearly average time series.

| (a)                      |                           |                           |                           |                           |
|--------------------------|---------------------------|---------------------------|---------------------------|---------------------------|
| CORNDVI <sub>1–23</sub>  |                           |                           |                           |                           |
|                          | 1CORNDVI <sub>1–23</sub>  | 2CORNDVI <sub>1–23</sub>  | 3CORNDVI <sub>1–23</sub>  | 4CORNDVI <sub>1–23</sub>  |
| 1scPDSI                  | 0.179                     | 0.215                     | 0.664 *                   | −0.205                    |
| 2scPDSI                  | −0.268                    | 0.476                     | −0.112                    | −0.461                    |
| 3scPDSI                  | −0.008                    | 0.584 *                   | −0.460                    | −0.290                    |
| 4scPDSI                  | −0.397                    | 0.215                     | −0.124                    | −0.491                    |
| (b)                      |                           |                           |                           |                           |
| COVnNDVI <sub>1–23</sub> |                           |                           |                           |                           |
|                          | 1COVnNDVI <sub>1–23</sub> | 2COVnNDVI <sub>1–23</sub> | 3COVnNDVI <sub>1–23</sub> | 4COVnNDVI <sub>1–23</sub> |
| 1scPDSI                  | 0.031                     | 0.712 *                   | −0.456                    | −0.070                    |
| 2scPDSI                  | −0.263                    | 0.517                     | 0.265                     | 0.181                     |
| 3scPDSI                  | 0.033                     | 0.195                     | 0.731 *                   | 0.024                     |
| 4scPDSI                  | −0.535                    | −0.278                    | 0.086                     | 0.414                     |
| (c)                      |                           |                           |                           |                           |
| CORNDVI <sub>8–18</sub>  |                           |                           |                           |                           |
|                          | 1CORNDVI <sub>8–18</sub>  | 2CORNDVI <sub>8–18</sub>  | 3CORNDVI <sub>8–18</sub>  | 4CORNDVI <sub>8–18</sub>  |
| 1scPDSI                  | 0.062                     | 0.825 *                   | 0.213                     | −0.384                    |
| 2scPDSI                  | 0.082                     | 0.450                     | 0.420                     | −0.392                    |
| 3scPDSI                  | −0.474                    | 0.120                     | 0.457                     | −0.195                    |
| 4scPDSI                  | 0.309                     | 0.054                     | 0.364                     | −0.423                    |
| (d)                      |                           |                           |                           |                           |
| COVnNDVI <sub>8–18</sub> |                           |                           |                           |                           |
|                          | 1COVnNDVI <sub>8–18</sub> | 2COVnNDVI <sub>8–18</sub> | 3COVnNDVI <sub>8–18</sub> | 4COVnNDVI <sub>8–18</sub> |
| 1scPDSI                  | 0.573                     | 0.713 *                   | −0.310                    | 0.374                     |
| 2scPDSI                  | 0.321                     | 0.608 *                   | 0.360                     | 0.349                     |
| 3scPDSI                  | −0.155                    | 0.337                     | 0.632 *                   | 0.160                     |
| 4scPDSI                  | 0.489                     | −0.013                    | 0.257                     | 0.261                     |
| (e)                      |                           |                           |                           |                           |
| CORNDII <sub>7–18</sub>  |                           |                           |                           |                           |
|                          | 1CORNDII <sub>7–18</sub>  | 2CORNDII <sub>7–18</sub>  | 3CORNDII <sub>7–18</sub>  | 4CORNDII <sub>7–18</sub>  |
| 1scPDSI                  | 0.736 *                   | 0.153                     | 0.660 *                   | 0.702 *                   |
| 2scPDSI                  | −0.172                    | −0.093                    | −0.193                    | −0.011                    |
| 3scPDSI                  | −0.576 *                  | 0.335                     | −0.238                    | −0.386                    |
| 4scPDSI                  | 0.030                     | −0.092                    | −0.050                    | −0.063                    |
| (f)                      |                           |                           |                           |                           |
| COVnNDII <sub>7–18</sub> |                           |                           |                           |                           |
|                          | 1COVnNDII <sub>7–18</sub> | 2COVnNDII <sub>7–18</sub> | 3COVnNDII <sub>7–18</sub> | 4COVnNDII <sub>7–18</sub> |
| 1scPDSI                  | 0.717 *                   | −0.374                    | 0.189                     | 0.608 *                   |
| 2scPDSI                  | −0.199                    | −0.278                    | −0.260                    | 0.502                     |
| 3scPDSI                  | −0.559                    | 0.257                     | 0.131                     | −0.023                    |
| 4scPDSI                  | −0.010                    | −0.243                    | −0.288                    | 0.583 *                   |

\*—significant at the level  $p < 0.05$ .

**Table S3.** Correlation based comparison between first four corresponding PCs derived from Varimax (V) and Promax (P) rotations (ROT) of (a) the first five loadings of the COVnNDVI<sub>8–18</sub> dataset (covariance-matrix based S-mode PCA decomposition of the normalized vegetation season NDVI time series) and (b) the first four loadings of the COVnNDII<sub>7–18</sub> dataset (covariance-matrix based S-mode PCA decomposition of the normalized vegetation season NDII7 time series).

| (a)                                                                 |             |          |
|---------------------------------------------------------------------|-------------|----------|
| PCs                                                                 | Correlation | <i>p</i> |
| 1COVnNDVI <sub>8–18</sub> ROT5V vs. 1COVnNDVI <sub>8–18</sub> ROT5P | 0.904       | 0.000    |
| 2COVnNDVI <sub>8–18</sub> ROT5V vs. 2COVnNDVI <sub>8–18</sub> ROT5P | 0.890       | 0.000    |
| 3COVnNDVI <sub>8–18</sub> ROT5V vs. 3COVnNDVI <sub>8–18</sub> ROT5P | 0.902       | 0.000    |
| 4COVnNDVI <sub>8–18</sub> ROT5V vs. 4COVnNDVI <sub>8–18</sub> ROT5P | 0.867       | 0.000    |
| (b)                                                                 |             |          |
| PCs                                                                 | Correlation | <i>p</i> |
| 1COVnNDII <sub>7–18</sub> ROT4V vs. 1COVnNDII <sub>7–18</sub> ROT4P | 0.910       | 0.000    |
| 2COVnNDII <sub>7–18</sub> ROT4V vs. 2COVnNDII <sub>7–18</sub> ROT4P | 0.897       | 0.000    |
| 3COVnNDII <sub>7–18</sub> ROT4V vs. 3COVnNDII <sub>7–18</sub> ROT4P | 0.919       | 0.000    |
| 4COVnNDII <sub>7–18</sub> ROT4V vs. 4COVnNDII <sub>7–18</sub> ROT4P | 0.924       | 0.000    |

\*—significant at the level  $p < 0.05$ .

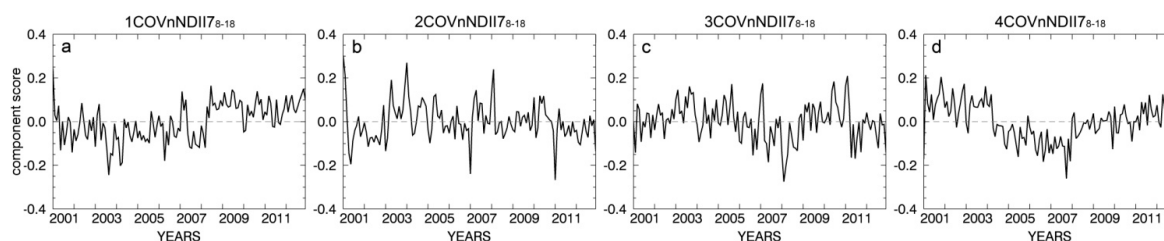

**Figure S6.** First four PCs resulted from the S-mode covariance-matrix based PCA of the nNDII<sub>7–18</sub> (z-score normalized vegetation season NDII7) time series, herein: (a) 1COVnNDII<sub>7–18</sub>; (b) 2COVnNDII<sub>7–18</sub>; (c) 3COVnNDII<sub>7–18</sub> and (d) 4COVnNDII<sub>7–18</sub>. Temporal patterns explained 11.98%, 3.39%, 2.23% and 1.66% of the total nNDII<sub>7–18</sub> time series variance respectively.

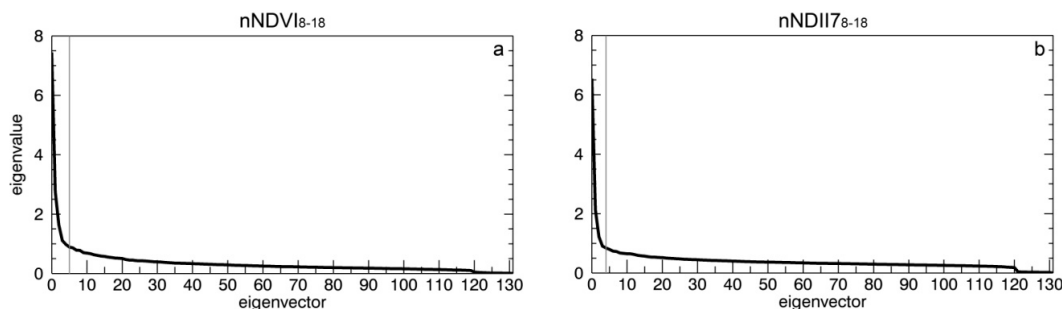

**Figure S7.** Plots of eigenvalues of (a) the covariance-matrix based PCA decomposition of the nNDVI<sub>8–18</sub> (vegetation season normalized NDVI) time series; and (b) covariance-matrix based PCA decomposition of the nNDII<sub>7–18</sub> (vegetation season normalized NDII7) time series. Vertical lines represents cutoff value of the Cattell's scree test: 5 and 4 for (a) and (b) respectively.

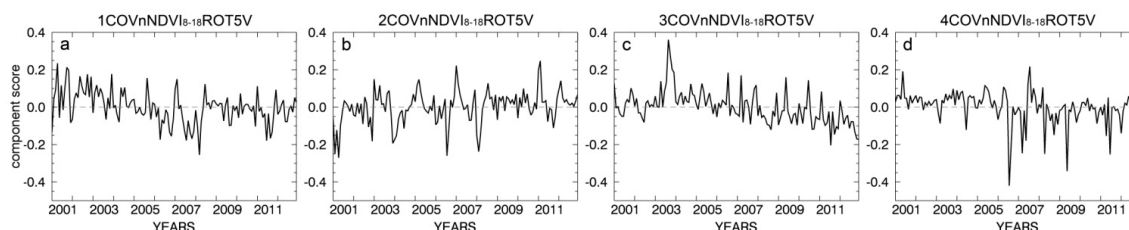

**Figure S8.** First four PCs (from (a) to (d) in increasing order) resulted from the Varimax rotation of the first five loadings of the lowest order retained from the COVnNDVI<sub>8–18</sub> PCA results (covariance-matrix based S-mode PCA of the z-score normalized vegetation-season NDVI time series).

**Table S4.** Correlation among the scPDSI scores and first four PCs obtained from Varimax (V) and Promax (P) rotations (ROT) of (a) the first five loadings of the COVnNDVI<sub>8-18</sub> dataset (covariance-matrix based S-mode PCA of the normalized vegetation season NDVI time series) and (b) the first four loadings of the COVnNDII<sub>7-18</sub> dataset (covariance-matrix based S-mode PCA of the normalized vegetation season NDII7 time series). Due to inconsistent length of scPDSI, nNDVI<sub>8-18</sub> and nNDII<sub>7-18</sub> datasets all time evolution patterns were converted into yearly average time series.

| (a)     |                                |          |        |        |                                |          |          |         |
|---------|--------------------------------|----------|--------|--------|--------------------------------|----------|----------|---------|
|         | COVnNDVI <sub>8-18</sub> ROT5V |          |        |        | COVnNDVI <sub>8-18</sub> ROT5P |          |          |         |
|         | 1PC                            | 2PC      | 3PC    | 4PC    | 1PC                            | 2PC      | 3PC      | 4PC     |
| 1scPDSI | 0.308                          | −0.203   | −0.569 | −0.104 | 0.290                          | −0.124   | −0.590 * | −0.205  |
| 2scPDSI | 0.638 *                        | −0.495   | 0.107  | 0.353  | 0.615 *                        | −0.536   | 0.186    | 0.333   |
| 3scPDSI | 0.476                          | −0.588 * | 0.533  | 0.380  | 0.504                          | −0.576 * | 0.607 *  | 0.324   |
| 4scPDSI | 0.503                          | 0.057    | 0.057  | 0.532  | 0.433                          | 0.020    | 0.029    | 0.612 * |

  

| (b)     |                                |        |        |         |                                |        |        |         |
|---------|--------------------------------|--------|--------|---------|--------------------------------|--------|--------|---------|
|         | COVnNDII <sub>7-18</sub> ROT4V |        |        |         | COVnNDII <sub>7-18</sub> ROT4P |        |        |         |
|         | 1PC                            | 2PC    | 3PC    | 4PC     | 1PC                            | 2PC    | 3PC    | 4PC     |
| 1scPDSI | 0.072                          | −0.121 | −0.548 | 0.751 * | 0.061                          | −0.254 | −0.550 | 0.772 * |
| 2scPDSI | 0.614 *                        | −0.294 | 0.143  | 0.301   | 0.689 *                        | −0.427 | 0.172  | 0.241   |
| 3scPDSI | 0.396                          | 0.410  | 0.200  | −0.331  | 0.365                          | 0.172  | 0.260  | −0.397  |
| 4scPDSI | 0.527                          | −0.267 | 0.090  | 0.466   | 0.515                          | −0.321 | 0.066  | 0.400   |

\*—significant at the level  $p < 0.05$ .

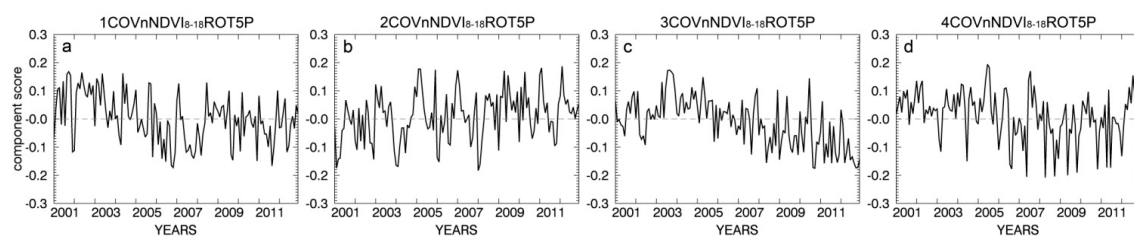

**Figure S9.** First four PCs (from (a) to (d) in increasing order) resulted from the Promax rotation of the first five loadings of the lowest order retained from the COVnNDVI<sub>8-18</sub> PCA results (covariance-matrix based S-mode PCA of the z-score normalized vegetation season NDVI time series).

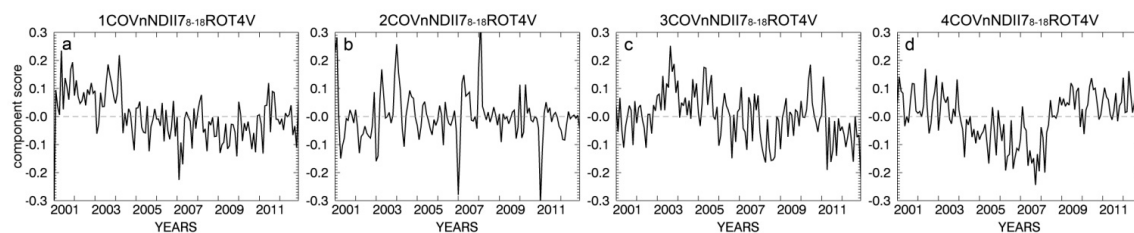

**Figure S10.** First four PCs (from (a) to (d) in increasing order) resulted from the Varimax rotation of the first four loadings of the lowest order retained from the COVnNDII<sub>7-18</sub> PCA results (covariance-matrix based S-mode PCA of the z-score normalized vegetation season NDII7 time series).

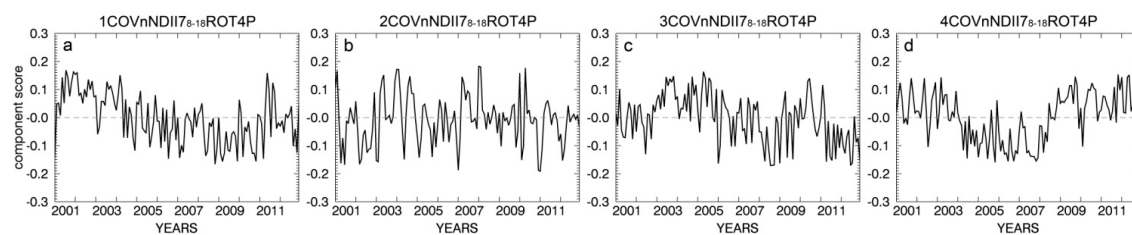

**Figure S11.** First four PCs (from (a) to (d) in increasing order) resulted from the Promax rotation of the first four loadings of the lowest order retained from the COVnNDII7-18 PCA results (covariance-matrix based S-mode PCA of the z-score normalized vegetation season NDII7 time series).

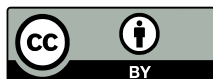

© 2016 by the authors; licensee MDPI, Basel, Switzerland. This article is an open access article distributed under the terms and conditions of the Creative Commons Attribution (CC-BY) license (<http://creativecommons.org/licenses/by/4.0/>).
